# Supplementary material
Source: ML conference proceedings conference paper supplement (https://openreview.net/forum?id=64WeVllQjq)
Supplement: supplementary_material [file Usage Instructions for Code.pdf › Supplementary Material/Usage Instructions for Code.pdf]

# Usage Instructions for Code

## 1. General Overview

This repository implements **MK-CAViT**, a multi-scale Vision Transformer with Fast-HGR correlation attention and gated two-stage fusion.

``MK_CAViT.py`` – model definition

(three-path tokenizer, Fast-HGR attention, small $\leftrightarrow$ mid gated fusion + large-context mixing, adaptive head gating, classification head, light segmentation head)

``train_utils.py`` – training/evaluation utilities for classification and segmentation

Dataset drivers

``MK_CAViT_ImageNet.py`` — ImageNet classification

``MK_CAViT_COCO.py`` — COCO multi-label classification (80 classes)

``MK_CAViT_ADE20K.py`` — ADE20K semantic segmentation (150 classes)

Each driver trains and evaluates on its dataset.

## 2. Prerequisites

Python  $\geq 3.8$

PyTorch  $\geq 1.12$  (2.x recommended) and torchvision matching your PyTorch build

Pillow (image I/O)

NumPy (ADE20K loader)

pycocotools (COCO only)

CUDA GPU recommended; mixed precision is optional via ``--amp``

Install example:

```
```bash
pip install torch torchvision pillow numpy pycocotools
```
```

## 3. Code Map

Fast-HGR logits: ``fast_hgr_logits`` in ``MK_CAViT.py``

(all-pairs cosine + batch trace( $\text{cov}(Q) \cdot \text{cov}(K)$ ) broadcast)

Attention: ``FastHGRAttention`` (self/cross by passing different ``x_q``, ``x_kv``)

Tokenizer: ``MultiScaleTokenizer`` ( $3 \times 3$  /  $7 \times 7$  stride 2 /  $15 \times 15$  “same”)

Fusion: ``MultiScaleFusion`` (gated small $\leftrightarrow$ mid cross-mix  $\rightarrow$  large-context mixing with adaptive  $\gamma$ )

Blocks: ``Block`` (LN  $\rightarrow$  Fast-HGR attn  $\rightarrow$  MLP + DropPath)

Model builders: ``mk_cavit_tiny/small/base``

Segmentation path: ``forward_seg`` (token map  $\rightarrow$  small head  $\rightarrow$  bilinear upsample)

## 4. Dataset Preparation

**ImageNet**

```

```
/path/to/imagenet/
train/class1/...
```

```
val/class1/...
...
```

## **COCO 2017**

```
...
/path/to/coco/
train2017/
val2017/
annotations/
instances_train2017.json
instances_val2017.json
...
```

Use the standard COCO layout above. The script takes `--root` (the folder containing train2017/`, val2017/`, annotations/`) and two JSON paths.`

## **ADE20K**

```
...
/path/to/ADE20K/
images/training/
images/validation/
annotations/training/
annotations/validation/
...
```

Segmentation head uses 150 classes; `ignore_index=255``.

Input size note: default sizes (224 for classification, 512 for ADE20K) are even to match the small branch's stride-2 grid. If you change `--size``, keep it even.

## **5. How to Run**

### **ImageNet — single-label classification**

```
```bash
python MK_CAViT_ImageNet.py \
root /path/to/imagenet \
epochs 100 --batch_size 128 --workers 8 \
lr 5e-4 --mu 0.1 --amp
...
```

`--mu`` weights the Fast-HGR term in the combined loss ( $L=L_{\text{CE}}-\mu L_{\text{F-HGR}}$ ).

### **COCO — multi-label classification (80 classes)**

```
```bash
python MK_CAViT_COCO.py \
root /path/to/coco \
ann_train /path/to/coco/annotations/instances_train2017.json \
ann_val /path/to/coco/annotations/instances_val2017.json \
epochs 50 --batch_size 64 --workers 8 \
```

```
lr 5e-4 --mu 0.1 --amp
...

```

Targets are 80-D multi-hot vectors; the driver uses ``BCEWithLogitsLoss``.

### **ADE20K — semantic segmentation (150 classes)**

```
```bash
python MK_CAViT_ADE20K.py \
root /path/to/ADE20K \
size 512 \
epochs 80 --batch_size 4 --workers 8 \
lr 3e-4 --amp
...

```

Uses pixel-wise cross-entropy with ``ignore_index=255``.

Logs include validation pixel accuracy.

## **6. Changing Model Size / Classes**

```
```python
from MK_CAViT import mk_cavit_tiny, mk_cavit_small, mk_cavit_base
model = mk_cavit_small(num_classes=K, img_size=224)
...

```

Pick a builder (``tiny/small/base``) and set ``num_classes`` to your dataset's class count. For segmentation, ``MK_CAViT_ADE20K.py`` builds the model with ``num_classes=150`` by default.

## **7. Mixed Precision & Performance Tips**

Add ``--amp`` to enable automatic mixed precision (saves memory, speeds up training).

Increase ``--batch_size`` until GPU memory is saturated; tune ``--workers`` for I/O.

COCO: ensure ``--root`` points to the directory containing ``train2017/``, ``val2017/``, and both annotation JSONs.

Determinism: set seeds with the built-in utility (drivers already call ``set_seed``).

## **8. Troubleshooting**

Shape assertion: “Token count does not match small-branch spatial size” — check that ``--size`` is even and that your transforms do not alter spatial size unexpectedly.

pycocotools import error: install a wheel matching your Python/CUDA; on Windows use ``pip install pycocotools-windows``.

Slow dataloading: increase ``--workers``, use SSD storage, and set ``pin_memory=True`` (already set).
